# Supplementary material
Source: publisher site journal article supplement (https://www.dovepress.com/get_supplementary_file.php?f=466280.docx)
Supplement: Supplementary file 1 [file get_supplementary_file.php]

Supplementary Appendix

| **Study** | **Design** | **Data source** | **N with COPD** | **Control** | **CV outcomes** | **FU time points** | **Analysis** |
| --- | --- | --- | --- | --- | --- | --- | --- |
| Dransfield 202215 | Prospective (RCT cohort) | IMPACT trial | 10,355 | Pre- exacerbation period | - New/worsened cardiac arrhythmia - Cardiac failure - Ischemic heart disease - Hypertension - Central nervous system haemorrhages and cerebrovascular conditions | - 1-30 days - 31-90 days - 91-365 days | Cox time-dependent |
| Reilev 201997 | Case-crossover | The Danish Health Data Authority | 118,807 | Pre-exacerbation period (4x 4 week windows) | - Myocardial infarction - Stroke - Cardiovascular death - MACE (composite) | - 4 weeks | Logistic regression |
| Goto 201898 | Case series | USA state emergency department and inpatient databases | 362,867 | Pre-exacerbation period (30 days or 1 year) | - Myocardial infarction - Ischemic stroke - Haemorrhagic stroke - Heart failure - Atrial fibrillation - Pulmonary embolism | - 30 days - 1 year | Poisson regression |
| Kunisaki 201899 | *Post hoc* analysis (RCT cohort) | SUMMIT trial | 4,704 | Non-exacerbation periods (both AE and non-AE patients) | - CV event (CV death, myocardial infarction, stroke, unstable angina, transient ischemic attack) | - 30 days - 31 days-1 year - >1 year | Cox time-dependent |
| Rothnie 2018100 | Case series | UK Clinical Practice Research Datalink (CPRD) | 5,696 | Non-exacerbation periods | - Myocardial infarction - Ischermic stroke | - 1-3 days - 4-7 days - 8-14 days - 15-28 days - 29-91 days - 91 days | Poisson regression |
| Portegies 2016101 | Prospective (population-based cohort study) | The Rotterdam Study | 1,566 | Non-exacerbation periods | - Stroke | - 7 weeks | Cox time-dependent |
| Halpin 2011102 | Prospective (RCT cohort) | UPLIFT trial | 5,992 | Pre-exacerbation period (30 or 180 days) | - Cardiac failure - Ischemic heart disease - Atrial fibrillation/flutter - Myocardial infarction - Angina - Stroke | - 30 days - 180 days | Incidence rates |
| Donaldson 2010103 | Observational, retrospective | The Health Improvement Network | 25,857 | Pre-exacerbation period (49 days) | - Myocardial infarction - Ischemic stroke | - 5 days - 49 days - 6-10 days - 11-15 days - 16-49 days | Poisson regression |

| **Study** | **CV outcome** | **Min follow-up** | **Risk at min follow-up (95% CIs)** | **Max follow-up** | **Risk at max follow-up (95% CIs)** |
| --- | --- | --- | --- | --- | --- |
| Reilev 2019 | MACE (composite) | 4 weeks | OR 3.70 (3.60, 3.80) | - | - |
| Myocardial infarction | OR 3.57 (3.43, 3.71) |
| Stroke | OR 2.78 (2.60, 2.97) |
| CV death | OR 4.33 (4.15, 4.52) |
| Goto 2018 | Composite | 30 days | IRR 1.34 (1.30, 1.39) | 1 year | IRR 1.20 (1.18, 1.22) |
| Myocardial infarction | IRR 1.28 (1.17, 1.39) | IRR 1.10 (1.05, 1.15) |
| Ischemic stroke | IRR 1.77 (1.55, 2.01) | IRR 1.39 (1.30, 1.47) |
| Haemorrhagic stroke | IRR 1.73 (1.18, 2.54) | IRR 1.71 (1.45, 2.02) |
| Heart failure | IRR 1.25 (1.20, 1.30) | IRR 1.20 (1.17, 1.22) |
| Atrial fibrillation | IRR 1.52 (1.39, 1.66) | IRR 1.19 (1.14, 1.25) |
| Pulmonary embolism | IRR 1.89 (1.65, 2.17) | IRR 1.27 (1.18, 1.37) |
| Kunisaki 2018 | CV event (CV death, myocardial infarction, stroke, unstable angina, transient ischemic attack) | 1-30 days | HR 3.8 (2.7, 5.5) | >1 year | HR 1.2 (0.8, 1.7) |
| Rothnie 2018 | Myocardial infarction | 1-3 days | Moderate AE: IRR 1.96 (1.52, 2.52)  Severe AE: IRR 8.00 (5.81, 11.01) | 91 days | Moderate AE: IRR 1.58 (1.46, 1.71)  Severe AE: IRR 2.58 (2.26, 2.95) |
| Ischemic stroke | Moderate AE: IRR 1.43 (1.00, 2.04)  Severe AER: IRR 3.39 (1.52, 7.58) | Moderate AE: IRR 1.45 (1.33, 1.57)  Severe AE: IRR 1.97 (1.66, 2.33) |
| Portegies 2016 | Stroke | 7 weeks | 1.28 (0.81, 2.02) | - | - |
| Halpin 2011 | Cardiac failure | 30 days | RaR 14.08 (3.36, 59.1) | 180 days | RaR 10.71 (3.83, 29.9) |
| Ischemic heart disease | RaR 4.62 (1.76, 12.2) | RaR 2.85 (1.47, 5.54) |
| Atrial fibrillation/flutter | RaR 17.06 (2.27, 128) | RaR 6.66 (2.32, 19.14) |
| Myocardial infarction | RaR 13.04 (1.71, 99.7) | RaR 3.05 (1.29, 7.20) |
| Angina | RaR 2.75 (0.88, 8.65) | RaR 3.20 (1.16, 8.79) |
| Stroke | RaR 4.51 (0.97, 20.86) | RaR 2.31 (0.88, 6.06) |
| Donaldson 2010 | Myocardial infarction | 5 days | IRR 2.27 (1.1, 4.7) | 49 days | IRR 1.11 (0.7, 1.7) |
| Stroke | IRR 0.55 (0.1, 2.3) | IRR 0.93 (0.6, 1.5) |

AE, acute exacerbation; CV, cardiovascular; HR, hazard ratio; IRR, incidence rate ratio; MACE, major adverse cardiovascular events; OR, odds ratio; RaR, rate ratio.
